# Supplementary material
Source: MDPI journal article supplement (https://www.mdpi.com/2076-3417/11/2/535)
Supplement: s1 [file s1]

---

Article

# A Phantom Study to Investigate Robustness and Reproducibility of Grey Level Co-Occurrence Matrix (GLCM)-Based Radiomics Features for PET

Mahbubunnabi Tamal <sup>†</sup>

Department of Biomedical Engineering, College of Engineering, Imam Abdulrahman Bin Faisal University, Dammam 31441, Saudi Arabia; mtamal@yahoo.com or mtamal@iau.edu.sa

<sup>†</sup> Submission is extension of conference paper: Tamal, M. Grey Level Co-occurrence Matrix (GLCM) as a Radiomics Feature for Artificial Intelligence (AI) Assisted Positron Emission Tomography (PET) Images Analysis. *Materials Science and Engineering Conference Series*, **2019**, 646, 12047, doi:10.1088/1757-899X/646/1/012047.

**Citation:** Tamal, M. A Phantom Study to Investigate Robustness and Reproducibility of Grey Level Co-Occurrence Matrix (GLCM) Based Radiomics Features for PET. *Appl. Sci.* **2021**, *11*, 535. <https://doi.org/10.3390/app11020535>

Received: 09 December 2020

Accepted: 04 January 2021

Published: 7 January 2021

**Publisher's Note:** MDPI stays neutral with regard to jurisdictional claims in published maps and institutional affiliations.

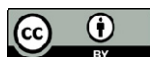

**Copyright:** © 2021 by the author. Licensee MDPI, Basel, Switzerland. This article is an open access article distributed under the terms and conditions of the Creative Commons Attribution (CC BY) license (<http://creativecommons.org/licenses/by/4.0/>).

## Supplemental Table

Table S1. Relationships of textural features with tumor heterogeneity for different parameters and methods.

| Study (group)                    | # of Patients | Machine                                           | Cancer Type                | Reconstruction and Smoothing                                                                                           | Dose and Tracer                                         | Metrics                                                                                                                                            | Quantisation                                             | Segmentation                                                                                                                                                    | Direction                      | Tumor Size (baseline)          | Tumor Size (after treatment) | Prediction of Response                                                                                                                                      |
|----------------------------------|---------------|---------------------------------------------------|----------------------------|------------------------------------------------------------------------------------------------------------------------|---------------------------------------------------------|----------------------------------------------------------------------------------------------------------------------------------------------------|----------------------------------------------------------|-----------------------------------------------------------------------------------------------------------------------------------------------------------------|--------------------------------|--------------------------------|------------------------------|-------------------------------------------------------------------------------------------------------------------------------------------------------------|
| Hatt (2011). INSERM France [1]   | 25            | Biograph PET/CT Siemens                           | Non-small cell lung cancer | Ordered subsets maximization algorithm (4 iterations, 8 subsets). Attenuation correction using CT data.                | 45–60 min after injection                               | Measuring using COV, lobectomy, CT images, MATV                                                                                                    |                                                          | 2 manual delineations on CT, I <sub>50</sub> , adaptive (Nestle) and FLAB                                                                                       |                                |                                |                              | Relationship between volumes and impact of size and uptake in heterogeneity                                                                                 |
| Tixier (2011). INSERM France [2] | 41            | PET/CT Gemini; Phillips                           | Esophageal                 | 3D row action maximum likelihood algorithm (2 iteration, relaxation 0.05 & 3D gaussian post filtering of 5 mm in FWHM) | 5 MBq/kg, avg. 54 min after injection                   | SUV, intensity histogram, voxel alignment matrix, intensity—size zone matrix, co-occurrence, neighbourhood intensity-difference matrix. ROC curves | 16, 32, 64, 128 discrete values. 64 is subsequently used | Primary was first identified by experienced nuclear medicine physician and then delineated automatically using fuzzy locally adaptive Bayesian algorithm (FLAB) | 13 different angular direction |                                |                              | Homogeneity and entropy significantly differentiate between non-responders with others (partial or complete responders). No significant differences between |
| Tixier (2012). INSERM France [3] | 16            | PET/CT Gemini; Phillips relaxation parameter 0.05 | Esophageal                 |                                                                                                                        | 2 min acquisition time, 60 min after injecting 6 MBq/kg | 8 parameters for histogram, 17 for co-occurrence/intensity-size zone                                                                               | 8, 16, 32, 64, 128                                       | Primary was first identified by experienced nuclear medicine physician and then delineated automatically using fuzzy locally adaptive                           | 13 different angular direction | Larger than 10 cm <sup>3</sup> |                              | Reproducibility study (Entropy is the most reproducible). Entropy, homogeneity and dissimilarity                                                            |

|                                  |     |                       |                              |                                                                                                                                                                                     | Bayesian algorithm<br>(FLAB)                                                                                                  |                                                                                                                                                                                                                                                                                                                                                                                             | are preferred<br>features                                                                                                                                                      |                                                                                                                                                   |
|----------------------------------|-----|-----------------------|------------------------------|-------------------------------------------------------------------------------------------------------------------------------------------------------------------------------------|-------------------------------------------------------------------------------------------------------------------------------|---------------------------------------------------------------------------------------------------------------------------------------------------------------------------------------------------------------------------------------------------------------------------------------------------------------------------------------------------------------------------------------------|--------------------------------------------------------------------------------------------------------------------------------------------------------------------------------|---------------------------------------------------------------------------------------------------------------------------------------------------|
| Hatt (2013). INSERM France [4]   | 50  | Philips Gemini PET/CT | Locally advanced oesophageal | -CT attenuation correction<br>-3D row-action maximum likelihood algorithm (2 iterations, relaxation parameter 0.05, 5 mm 3D Gaussian post filtering, 4 × 4 × 4 voxel grid sampling) | 5 MBq/kg<br>60 min before scan                                                                                                | AUC-CSH<br>-only those shown as robust for different reconstruction, acquisition & reproducibility<br>-entropy, homogeneity, dissimilarity, intensity variability, size-zone variability, zone percentage, high intensity emphasis. (preferred)<br>Correlations assessed using Pearson's correlation coefficient<br>Bland-Altman assessed variability of image derived parameter<br>AUC-ROC | Delineated in 3 ways: 42% of SUV <sub>max</sub> threshold; adaptive threshold accounted for tumor/background difference; Fuzzy locally adaptive Bayesian (FLAB)                | Heterogeneity parameter more dependent on delineation than PVC. Entropy and homogeneity were robust to delineation and PVC                        |
|                                  |     |                       |                              |                                                                                                                                                                                     |                                                                                                                               |                                                                                                                                                                                                                                                                                                                                                                                             |                                                                                                                                                                                |                                                                                                                                                   |
| Tixier (2014). INSERM France [5] | 102 | Philips Gemini PET/CT | Non-small cell lung cancer   | CT-based attenuation correction and a 3D row-action maximum likelihood algorithm with a previously optimized protocol (2                                                            | 3D PET data were subsequently acquired with 2 min per bed position for 60 min<br><br><sup>18</sup> F-FDG (5 MBq/kg; 425 ± 95; | A 64-gray-level quantization was used.                                                                                                                                                                                                                                                                                                                                                      | FLAB was exploited in this work using 2 or 3 classes to adequately cover the entire MATV, including low-uptake regions.<br><br>Local features were computed over 13 directions | Primary tumors with a MATV larger than 3 cm <sup>3</sup><br><br>Change of size is not explicitly reported. Homogeneity, entropy and dissimilarity |

|                                |     |                                                                   |                 |                                                                                                                                                     |                                                                                                                   |                                               |       |               |  |                                                                     |
|--------------------------------|-----|-------------------------------------------------------------------|-----------------|-----------------------------------------------------------------------------------------------------------------------------------------------------|-------------------------------------------------------------------------------------------------------------------|-----------------------------------------------|-------|---------------|--|---------------------------------------------------------------------|
|                                |     |                                                                   |                 | iterations; relaxation parameter, 0.05; 5 mm in full width at half maximum 3D Gaussian post filtering; 4 × 4 × 4 mm voxels grid sampling)           | range, 223–690)                                                                                                   |                                               |       |               |  |                                                                     |
| Hatt (2015). INSERM France [6] | 555 |                                                                   |                 |                                                                                                                                                     |                                                                                                                   |                                               |       | FLAB          |  |                                                                     |
| Kidd (2008). Washington [7]    | 72  | Hybrid PET/CT scanner (Biograph LSO 2, Siemens Medical Solutions) | Cervical cancer | Ordered-subset expectation maximization (subset and iteration are not mentioned) post reconstruction Gaussian filter (5 mm full width half maximum) | 42–120 min (median, 65 min) after the administration of 15–20 mCi FDG, with imaging times of 2–4 min/bed position | H (dV/dT) is heterogeneity                    |       | 40% threshold |  | 3 months after treatment. Change of size is not explicitly reported |
| Brooks (2011). Washington [8]  | 73  | Hybrid PET/CT scanner (Biograph LSO 2, Siemens Medical Solutions) | Cervical cancer | Ordered-subset expectation maximization (subset and iteration are not mentioned) post reconstruction Gaussian filter                                | 42–120 min (median, 65 min) after the administration of 15–20 mCi FDG, with imaging times of 2–4 min/bed          | The standard deviation, skewness and kurtosis | 8 bit | 40% threshold |  | Change of size is not explicitly reported                           |

|                                   |    |                                                                   |                    |                                                                                                                                                                                                                                                           |                                                                                                                                                      |                                                                                                                                                                    |                                                                                                                                                                        |                                     |
|-----------------------------------|----|-------------------------------------------------------------------|--------------------|-----------------------------------------------------------------------------------------------------------------------------------------------------------------------------------------------------------------------------------------------------------|------------------------------------------------------------------------------------------------------------------------------------------------------|--------------------------------------------------------------------------------------------------------------------------------------------------------------------|------------------------------------------------------------------------------------------------------------------------------------------------------------------------|-------------------------------------|
|                                   |    |                                                                   |                    | (5 mm full width half maximum)                                                                                                                                                                                                                            | position                                                                                                                                             |                                                                                                                                                                    |                                                                                                                                                                        |                                     |
| Brooks (2013).<br>Washington [9]  |    | Hybrid PET/CT scanner (Biograph LSO 2, Siemens Medical Solutions) | Cervical cancer    | Ordered-subset expectation maximization (subset and iteration are not mentioned) post reconstruction Gaussian filter (5 mm full width half maximum)                                                                                                       | 42–120 min (median, 65 min) after the administration of 15 to 20 mCi FDG, with imaging times of 2 to 4 min/bed position                              | New heterogeneity metric the sphericity, extent, Shannon entropy (S) and the accrued deviation from smoothest gradients ( $\zeta$ ) as image heterogeneity metrics | 40% threshold                                                                                                                                                          | Compared against experienced expert |
| Brooks (2013).<br>Washington [10] | 85 | $n = 58$<br>Siemens Biograph 2<br>$n = 27$<br>Siemens Biograph 40 | Cervical carcinoma | $n = 58$<br>OSEM 8 sets 2 iterations and 5.3 mm post reconstruction Gaussian smoothing<br>$n = 27$<br>OSEM 8 sets 4 iterations and 4 mm post reconstruction Gaussian smoothing (9 most recent Biograph 40 image sets underwent an additional point-spread | The maximum SUV of the tumors analysed ranged from 4 to 56 and approximately followed a log-normal distribution with median of 13 and variance of 74 | New heterogeneity metric the sphericity, extent, Shannon entropy (S) and the accrued deviation from smoothest gradients ( $\zeta$ ) as image heterogeneity metrics | 40% threshold (The oncologist then made slight manual adjustments to the ROI to remove any obvious non-tumor pixels such as those comprising bladder or bowel regions) | Size was not explicitly mentioned   |

|                                   |                                                                                                 |                                                         |                    |                                                                                                                                                                                         |                                                |                                |                                                                                                 |                                |                                                                                                                                                                          |
|-----------------------------------|-------------------------------------------------------------------------------------------------|---------------------------------------------------------|--------------------|-----------------------------------------------------------------------------------------------------------------------------------------------------------------------------------------|------------------------------------------------|--------------------------------|-------------------------------------------------------------------------------------------------|--------------------------------|--------------------------------------------------------------------------------------------------------------------------------------------------------------------------|
|                                   |                                                                                                 |                                                         |                    | function/time-of-flight correction)                                                                                                                                                     |                                                |                                |                                                                                                 |                                |                                                                                                                                                                          |
| Brooks (2015).<br>Washington [11] | 27 patients as well as simulation                                                               | Siemens Biograph 40                                     | Cervical carcinoma | OSEM 8 sets 4 iterations and 4 mm post reconstruction Gaussian smoothing (9 most recent Biograph 40 image sets underwent an additional point-spread function/time-of-flight correction) | Dissimilarity, homogeneity, energy and entropy | 8-bits (i.e., 256 gray levels) | 40% threshold for original data. Repeated with 50% threshold to compare with the simulated data | 26 different angular direction | After 3 months                                                                                                                                                           |
|                                   |                                                                                                 |                                                         |                    |                                                                                                                                                                                         |                                                |                                |                                                                                                 |                                |                                                                                                                                                                          |
| Orlhac (2014).<br>France [12]     | 150 lesions of 106 patients [28 (metastatic colorectal cancer (MCC)) 24 (NSCLC) 54 (breast can- | MCC—Discovery LS System. NSCLC and BC: Gemini TF PET/CT | MCC, NSCLC and BC  | MCC—OSEM with 2 iter 28 subsets and Gaussian post filtering (FWHM = 5.45 mm). NSCLC and BC: BLOB-OS-TF with 2 iter and 33 subsets                                                       |                                                |                                | Adaptive thresholding and 40% fixed threshold                                                   |                                | VOI greater than 5 mL used for texture analysis (77 voxels for MCC and 78 voxels for NSCLC and BC). MCC > 5.0030 cm <sup>3</sup> . NSCLC and BC > 4.9920 cm <sup>3</sup> |
|                                   |                                                                                                 |                                                         |                    |                                                                                                                                                                                         |                                                |                                |                                                                                                 |                                |                                                                                                                                                                          |

| cer)]                                           |    |                                                                                                                   |                                                       |                                                                                                                            |                                                |                                                                                                                                                                                                                                                        |                    |                                         |
|-------------------------------------------------|----|-------------------------------------------------------------------------------------------------------------------|-------------------------------------------------------|----------------------------------------------------------------------------------------------------------------------------|------------------------------------------------|--------------------------------------------------------------------------------------------------------------------------------------------------------------------------------------------------------------------------------------------------------|--------------------|-----------------------------------------|
| Cheng (2013).<br>Taiwan [13]                    | 70 | 60 × Discovery<br>ST 16 Scanner<br>(GE Healthcare).<br>9 × Biograph<br>mCT scanner<br>(siemens Medical Solutions) | Orapharyngeal squamous cell carcinoma (Head & neck)   | Attenuated with CT images<br>Ordered-subset expectation maximization (discovery:4 & 10; biograph 2 iterations, 21 subsets) | -imaged 50 min after injection -370 to 555 MBq | SUV histogram analysis, GLCM, NGTDM, -Spearman correlation coeff.,                                                                                                                                                                                     | 4, 16, 32, 64      | PMOD 3.3 software package               |
| Galavis (2010).<br>Wisconsin [14]               | 20 | PET/CT                                                                                                            | Adrenal gland carcinoma, lung, epiglottis, oesophagus | Ordered subset expectation maximization algorithm (4 iterations, 14 subsets × 2). Attenuation correction using CT data.    | 10 mCi                                         | 8 first order, 23 co-occurrence, 11 grey level run length matrix, 5 neighbouring grey level, 3 neighbourhood grey tone difference matrix                                                                                                               |                    |                                         |
| Willaime (2013).<br>Hammersmith.<br>London [15] | 15 | ECAT<br>962/HR+<br>scanner<br>(CTI/Siemens)                                                                       | Breast cancer                                         | OSEM iterative reconstruction method (360 iterations, 6 subsets). Filtered back projection to validate results             | 153–381 MBq, for 95 min                        | -SUV, Coefficient of variation, Skewness, Entropy, area under a cumulative histogram curve, GLCM, GLSZM, NGTDM, Homogeneity, Complexity.<br>-Normality of relative distances assessed using Shapiro-Wilk.<br>-Limits of repeatability were calculated. | 31 discrete frames | Regions of interest were drawn manually |

|                                                       |                                                                                        |                                                                                                              |                       |                                                                                                                                  |                  |                                                                                                                                         |                                                  |                                                                          |                                               |                                                                                                       |
|-------------------------------------------------------|----------------------------------------------------------------------------------------|--------------------------------------------------------------------------------------------------------------|-----------------------|----------------------------------------------------------------------------------------------------------------------------------|------------------|-----------------------------------------------------------------------------------------------------------------------------------------|--------------------------------------------------|--------------------------------------------------------------------------|-----------------------------------------------|-------------------------------------------------------------------------------------------------------|
| Leijenaar (2013).<br>Test-retest.<br>Netherlands [16] | 11 (for<br>test<br>retest<br>cohort).<br>23 (in-<br>ter-<br>observ-<br>er co-<br>hort) | ECAT Exact<br>HR1 for test-<br>retest. SO-<br>MATOM Sen-<br>sation 16<br>ECAT ACCEL<br>for other co-<br>hort | NSCLC                 | -normalization<br>and attenua-<br>tion weighted<br>ordered subset<br>expectation<br>maximization<br>(2 iteration, 16<br>subsets) | FDG              | Gray level co-<br>occurrence (GLCM),<br>gray level run-<br>length (GLRLM)<br>and gray level size-<br>zone texture matri-<br>ces (GLSZM) | Equally<br>spaced bins<br>of 0.5 units<br>of SUV | 50% for test retest<br>cohort. Manual<br>delineation for<br>other cohort | 26 differ-<br>ent angu-<br>lar direc-<br>tion | Test-retest<br>and inter ob-<br>server                                                                |
| Lopez (2015).<br>Spain [17]                           | 38                                                                                     | Discovery STE<br>16 PET CT                                                                                   | NSCLC                 | OSEM with<br>manufacturer<br>recommended<br>parameters                                                                           | FDG<br>(370 MBq) | Energy, entropy,<br>contrast, correlation<br>and homogeneity<br>are calculated using<br>GLCM                                            |                                                  | SUV greater than<br>2.5                                                  | 13 differ-<br>ent angu-<br>lar direc-<br>tion | Relationship<br>between het-<br>erogeneity,<br>metabolic<br>parameters<br>and patholog-<br>ic staging |
| El Naqa (2009)<br>[18]                                | 14/9                                                                                   | PET/CT Sie-<br>mens bio-<br>graph                                                                            | Cervix/head &<br>neck | Ordered sub-<br>set' expecta-<br>tion maxi-<br>mization algo-<br>rithm                                                           |                  | SUV, Intensity-<br>volume histogram,<br>co-occurrence,<br>shape based,<br>spearman's rank.<br>ROC curve                                 |                                                  |                                                                          |                                               |                                                                                                       |

## References

- Hatt, M.; Rest, C.C.-L.; Van Baardwijk, A.; Lambin, P.; Pradier, O.; Visvikis, D. Impact of Tumor Size and Tracer Uptake Heterogeneity in 18F-FDG PET and CT Non-Small Cell Lung Cancer Tumor Delineation. *J. Nucl. Med.* **2011**, *52*, 1690–1697, doi:10.2967/jnumed.111.092767.
- Tixier, F.; Le Rest, C.C.; Hatt, M.; Albarghach, N.M.; Pradier, O.; Metges, J.-P.; Corcos, L.; Visvikis, D. Intratumor Heterogeneity Characterized by Textural Features on Baseline 18F-FDG PET Images Predicts Response to Concomitant Radiochemotherapy in Esophageal Cancer. *J. Nucl. Med.* **2011**, *52*, 369–378, doi:10.2967/jnumed.110.082404.
- Tixier, F.; Hatt, M.; Le Rest, C.C.; Le Pogam, A.; Corcos, L.; Visvikis, D. Reproducibility of Tumor Uptake Heterogeneity Characterization Through Textural Feature Analysis in 18F-FDG PET. *J. Nucl. Med.* **2012**, *53*, 693–700, doi:10.2967/jnumed.111.099127.
- Hatt, M.; Tixier, F.; Le Rest, C.C.; Pradier, O.; Visvikis, D. Robustness of intratumour 18F-FDG PET uptake heterogeneity quantification for therapy response prediction in oesophageal carcinoma. *Eur. J. Nucl. Med. Mol. Imaging* **2013**, *40*, 1662–1671, doi:10.1007/s00259-013-2486-8.
- Tixier, F.; Hatt, M.; Valla, C.; Fleury, V.; Lamour, C.; Ezzouhri, S.; Ingrand, P.; Perdrisot, R.; Visvikis, D.; Le Rest, C.C. Visual Versus Quantitative Assessment of Intratumor 18F-FDG PET Uptake Heterogeneity: Prognostic Value in Non-Small Cell Lung Cancer. *J. Nucl. Med.* **2014**, *55*, 1235–1241, doi:10.2967/jnumed.113.133389.
- Hatt, M.; Majdoub, M.; Vallières, M.; Tixier, F.; Le Rest, C.C.; Groheux, D.; Hindié, E.; Martineau, A.; Pradier, O.; Hustinx, R.; et al. 18F-FDG PET Uptake Characterization Through Texture Analysis: Investigating the Complementary Nature of Heterogeneity and Functional Tumor Volume in a Multi-Cancer Site Patient Cohort. *J. Nucl. Med.* **2015**, *56*, 38–44, doi:10.2967/jnumed.114.144055.
- Kidd, E.A.; Grigsby, P.W. Intratumoral Metabolic Heterogeneity of Cervical Cancer. *Clin. Cancer Res.* **2008**, *14*, 5236–5241, doi:10.1158/1078-0432.ccr-07-5252.
- Brooks, F.J.; Grigsby, P.W. Current measures of metabolic heterogeneity within cervical cancer do not predict disease outcome. *Radiat. Oncol.* **2011**, *6*, 69–8, doi:10.1186/1748-717X-6-69.
- Brooks, F.J.; Grigsby, P.W. Quantification of heterogeneity observed in medical images. *BMC Med Imaging* **2013**, *13*, 7, doi:10.1186/1471-2342-13-7.
- Brooks, F.J.; Grigsby, P.W. FDG uptake heterogeneity in FIGO IIb cervical carcinoma does not predict pelvic lymph node involvement. *Radiat. Oncol.* **2013**, *8*, 294, doi:10.1186/1748-717x-8-294.
- Brooks, F.J.; Grigsby, P.W. Low-Order Non-Spatial Effects Dominate Second-Order Spatial Effects in the Texture Quantifier Analysis of 18F-FDG-PET Images. *PLOS ONE* **2015**, *10*, e0116574, doi:10.1371/journal.pone.0116574.
- Orlhac, F.; Soussan, M.M.; Maisonneuve, J.-A.J.-A.; Garcia, C.; Vanderlinden, B.; Buvat, I. Tumor Texture Analysis in 18F-FDG PET: Relationships Between Texture Parameters, Histogram Indices, Standardized Uptake Values, Metabolic Volumes, and Total Lesion Glycolysis. *J. Nucl. Med.* **2014**, *55*, 414–422, doi:10.2967/jnumed.113.129858.
- Cheng, N.-M.; Fang, Y.-H.D.; Chang, J.T.-C.; Huang, C.-G.; Tsan, D.-L.; Ng, S.H.; Wang, H.-M.; Lin, C.-Y.; Liao, C.-T.; Yen, T.-C. Textural Features of Pretreatment 18F-FDG PET/CT Images: Prognostic Significance in Patients with Advanced T-Stage Oropharyngeal Squamous Cell Carcinoma. *J. Nucl. Med.* **2013**, *54*, 1703–1709, doi:10.2967/jnumed.112.119289.
- Galavis, P.E.; Hollensen, C.; Jallow, N.; Paliwal, B.; Jeraj, R. Variability of textural features in FDG PET images due to different acquisition modes and reconstruction parameters. *Acta Oncol.* **2010**, *49*, 1012–1016, doi:10.3109/0284186x.2010.498437.
- Willaime, J.M.Y.; E Turkheimer, F.; Kenny, L.M.; O Aboagye, E. Quantification of intra-tumour cell proliferation heterogeneity using imaging descriptors of 18F fluorothymidine-positron emission tomography. *Phys. Med. Biol.* **2012**, *58*, 187–203, doi:10.1088/0031-9155/58/2/187.
- Leijenaar, R.T.H.; Carvalho, S.; Zquez, E.R.V.; Van Elmpt, W.J.C.; Parmar, C.; Hoekstra, O.S.; Hoekstra, C.J.; Boellaard, R.; Dekker, A.L.A.J.; Gillies, R.J.; et al. Stability of FDG-PET Radiomics features: An integrated analysis of test-retest and inter-observer variability. *Acta Oncol.* **2013**, *52*, 1391–1397, doi:10.3109/0284186x.2013.812798.
- López, O.V.G.; Vicente, A.M.G.; Martínez, A.F.H.; Castrejón, Ángel M.S.; Londoño, G.A.J.; Udias, J.M.; Atance, P.L. Heterogeneity in [18F] Fluorodeoxyglucose Positron Emission Tomography/Computed Tomography of Non-Small Cell Lung Carcinoma and Its Relationship to Metabolic Parameters and Pathologic Staging. *Mol. Imaging* **2014**, *13*, doi:10.2310/7290.2014.00032.
- El Naqa, I.; Grigsby, P.; Apte, A.; Kidd, E.; Donnelly, E.; Khullar, D.; Chaudhari, S.; Yang, D.; Schmitt, M.; Laforest, R.; et al. Exploring feature-based approaches in PET images for predicting cancer treatment outcomes. *Pattern Recognit.* **2009**, *42*, 1162–1171, doi:10.1016/j.patcog.2008.08.011.
